# Supplementary material
Source: HighWire-hosted journal article supplement (https://www.annfammed.org/highwire/filestream/8924/field_highwire_adjunct_files/0/Barba_Supp.pdf)
Supplement: Barba_Supp.pdf [file Barba_Supp.pdf]

## Supplemental materials for:

Barba C, Hammond S, Hammond R. The patient profile: improving treatment adherence. *Ann Fam Med*. 2018;16(3):271-271.

## References

1. Health literacy: a prescription to end confusion. Nielsen-Bohlman L, et al, eds. Committee on Health Literacy, Board on Neuroscience and Behavioral Health. Institute of Medicine. <https://www.nap.edu/read/10883/chapter/1>.
2. The Newest Vital Sign. [https://www.pfizer.com/files/health/nvs\\_flipbook\\_english\\_final.pdf](https://www.pfizer.com/files/health/nvs_flipbook_english_final.pdf)
3. Wallace L. Patients' health literacy skills: the missing demographic variable in primary care research. *Ann Fam Me.d* 2006;4(1):85–86.
4. Kutner MA. *The Health Literacy of America's Adults: Results from the 2003 National Assessment of Adult Literacy*. Washington, DC: U.S. Department of Education, National Center for Education Statistics; 2006.
5. Davis TC, Wolf MS, Bass PF III, et al. Low literacy impairs comprehension of prescription drug warning labels. *J Gen Intern Med*. 2006;21(8):847-851.
6. Aspden P; Institute of Medicine (U.S.) Committee on Identifying and Preventing Medication Errors, et al. *Preventing Medication Errors*. Washington, DC: National Academies Press; 2007.
7. Zarcodoolas, C et al. *Advancing Health Literacy: A Framework for Understanding and Action*. San Francisco, CA. Jossey-Bass. 2006.
